# Supplementary material
Source: PubMed Central journal article supplement (PMC4378390)
Supplement: pnas.201418682SI.pdf [file pnas.201418682SI.pdf]

# Supporting Information

Lau and Kim 10.1073/pnas.1418682112

## SI Text

### Model Experiment and Background

CMIP5 is the latest model intercomparison project sponsored by the World Climate Research Program's Working Group on Coupled Modeling to provide a framework for coordinated climate change experiments. The scope of CMIP5 include long-term simulations with different concentration pathways of emission mitigation scenarios, near-term decadal simulations, and emission-driven Earth System Model experiments (1, 2). The 1% per year CO<sub>2</sub> emission increase scenario used for this study applies to a suite of experiments designed to provide a calibration of the model's internal climate variability and response to increasing CO<sub>2</sub> (2). Experiments were started from the preindustrial levels of CO<sub>2</sub> concentration achieving a quadrupling of CO<sub>2</sub> at the end of a 140-y simulation. For this work, we used 33 participating models with various horizontal resolutions, ranging from 0.75° to 3.75°. Monthly mean winds, vertical motion, and precipitation data are regridded to a common grid (2.5° by 2.5°). CMIP5 model outputs are available from Earth System Grid Federation (ESGF) gateways (Program for Climate Model Diagnosis and Intercomparison, British Atmospheric Data Center, Deutsches Klimarechenzentrum, and National Computational Infrastructure), and links to ESGF gateways and modeling centers are available from [cmip-pcmdi.llnl.gov/cmip5/availability.html](http://cmip-pcmdi.llnl.gov/cmip5/availability.html).

### Vertical Motions

Changes in the rising branch of the HC, as reflected by the 500-hPa pressure velocity averaged over different latitudinal width, are shown in Fig. S1. In the near-equatorial regions (5°S–5°N), there is a robust increasing trend in upward motion, as indicated by the near-constant positive slope ( $\sim 5.2 \pm 1.0\% \text{ K}^{-1}$ ) and the small spread among the models. At wider latitude bands (10°S–10°N and 20°S–20°N), the changes in vertical motions are substantially muted. When the zonal averages are taken over the entire tropics (30°S–30°N), the vertical motions again show a robust rise, but with much smaller amplitude compared with 5°S–5°N. Based on the signs of the control and the trends, these results indicate that global warming enhances mean rising motion over the entire tropics (30°S–30°N), with the strongest signal coming from the near-equatorial region (5°S–5°N).

### Monthly Outgoing Longwave Radiation and Daily Cloud-Top Temperature

Monthly outgoing long wave radiation (OLR) is used as a proxy for tropical convection in this study. To better interpret the physical meaning of OLR with respect to tropical convection, we have investigated the relationship between observed OLR from National Oceanic and Atmospheric Administration Advanced Very High Resolution Radiometer (3) and daily Visible and Infrared Scanner Channel-4 brightness temperature  $T_b$  from Tropical Rainfall Measuring Mission. Fig. S2 shows the pdfs of daily  $T_b$  corresponding to different bands of OLR, i.e.,  $\text{OLR} < 220 \text{ W}\cdot\text{m}^{-2}$  (band 1),  $220 \text{ W}\cdot\text{m}^{-2} < \text{OLR} < 270 \text{ W}\cdot\text{m}^{-2}$  (band 2), and  $\text{OLR} > 270 \text{ W}\cdot\text{m}^{-2}$  (band 3) used in *Tropical Convection* to describe the physical nature of the cloud system. Here, daily values of  $T_b = 273 \text{ K}$  will be identified as the mean freezing level of the standard tropical atmosphere. The pdfs indicate that the three OLR bands are contributed by distinctly different cloud systems as evident in the wide range of  $T_b$  distributions with respect to the freezing level. Based on the fraction ( $\alpha$ ) of the daily population with  $T_b < 273 \text{ K}$ , band 1 ( $\alpha = 71\%$ ), band 2 ( $\alpha = 25\%$ ), and band 3 ( $\alpha = 3\%$ ) can be in-

terpreted, respectively, as contributions from mostly of ice-phase deep clouds, mixed-phase middle clouds, and warm shallow clouds.

### Anomalous Meridional Wind Height–Latitude Cross Sections of Individual Models

Fig. S3 shows the robustness of the response in the meridional wind as indicated by almost all models showing qualitatively the same response, i.e., a characteristic quadruple pattern in the upper troposphere (<300 hPa), signaling a rise of the region of maximum outflow of the HC, and a somewhat weakened return flow in the lower troposphere (>800 hPa) and near the surface toward the equator.

### Time Variation of Meridional Wind Profile

The time evolution of the meridional wind anomaly at 10°N and 10°S, respectively (Fig. S4), shows an increasingly stronger (weaker) outflow above (below) 200 hPa, in both hemispheres, as the CO<sub>2</sub> concentration increases. The near-constant positive slopes of the total wind isotachs above 200 hPa reflect a steady rise ( $\sim 3.5 \text{ hPa}$  per decade) of the region of maximum outflow of the HC. Computations of the meridional mass flux, i.e., mass weighted meridional wind at different cross sections show that the mass outflow at the upper portion (200–100 hPa) out of the 10°S–10°N zone is intensifying at a fast rate of  $+9.8 \pm 0.7\% \text{ K}^{-1}$ . The rate of increase is even faster at  $+17.0 \pm 1.7\% \text{ K}^{-1}$ , out of the 5°S–5°N zone, which corresponds to the core ascending branch of the HC. The increased meridional mass flux is compensated by strong inflow in the lower portion (400–200 hPa) of the climatological outflow region. Even with the strong compensation, the net anomalous mass flux over the climatological outflow region (400–100 hPa) out of the 5°S–5°N zone is still increasing, albeit at a much reduced net rate of  $1.9 \pm 0.8\% \text{ K}^{-1}$ .

### Meridional Mass Streamfunction and Zonal Wind

Changes in the HC associated with the DTS and their connection to the global circulations can also be clearly seen in the anomalous meridional mass streamfunction and zonal winds (Fig. S5). From the signs and locations of the anomalies compared with the control (Fig. S5A), it is clear that the upper branches (above 250 hPa) of the HC in the deep tropics are strengthened, while the lower portion (1,000–300 hPa) is weakened, consistent with an elevation of the climatological region of maximum outflow, i.e., a rise of the center of mass of the HC. The rise together with enhanced upper tropospheric vertical motion associated with DTS in the ascending branch of the HC allow stronger poleward outflow in the upper troposphere, thus extending the subsidence branches of the HC in both hemispheres further poleward from their climatological positions. A similar polar extension of the Ferrel cells in both hemispheres, although with much smaller amplitude, can also be discerned. The rise of the center of maximum outflow in the upper branch of the HC is also reflected in changes in the structure of the zonal wind anomaly (Fig. S5B). The most pronounced zonal wind acceleration is found near 100 hPa, above the climatological center at 150–200 hPa in both hemispheres. The subtropical westerly acceleration in both hemispheres is likely to be driven by the deeper convection, and the Coriolis force from the stronger outflow in the upper troposphere associated with the meridional wind anomalies noted in Fig. 3A and Fig. S3. Previous studies have suggested that the extratropical maximum may be related to enhanced baroclinicity due to increased temperature gradient at the upper troposphere, and polar shift of the wintertime storm tracks (4, 5).





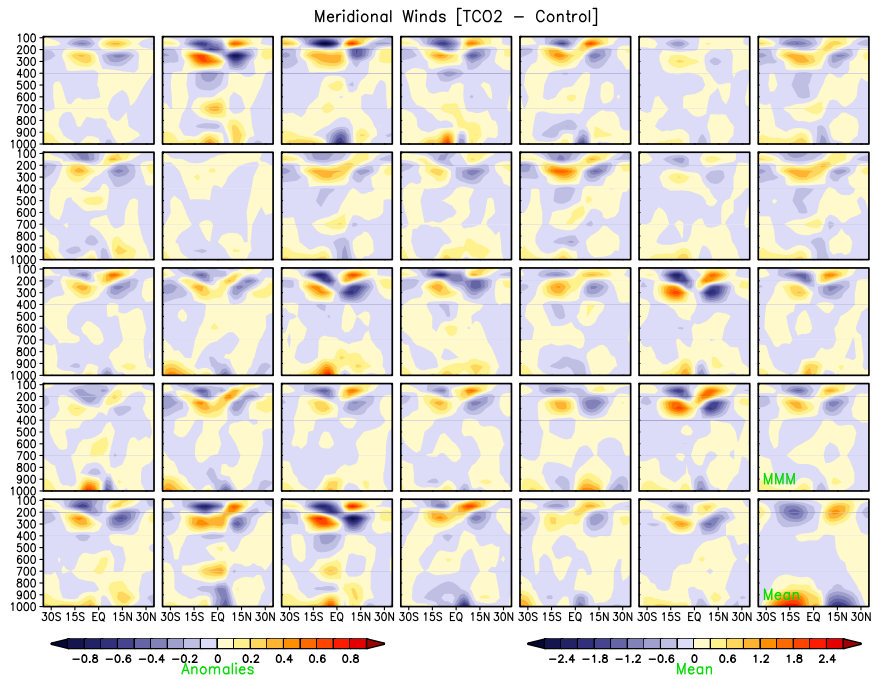

Fig. 53. Latitude–height cross sections of anomalous meridional winds in the tropics for each of 33 CMIP5 models. The MMM anomaly and control are shown in the bottom two panels of the last column. Unit is meters per second.

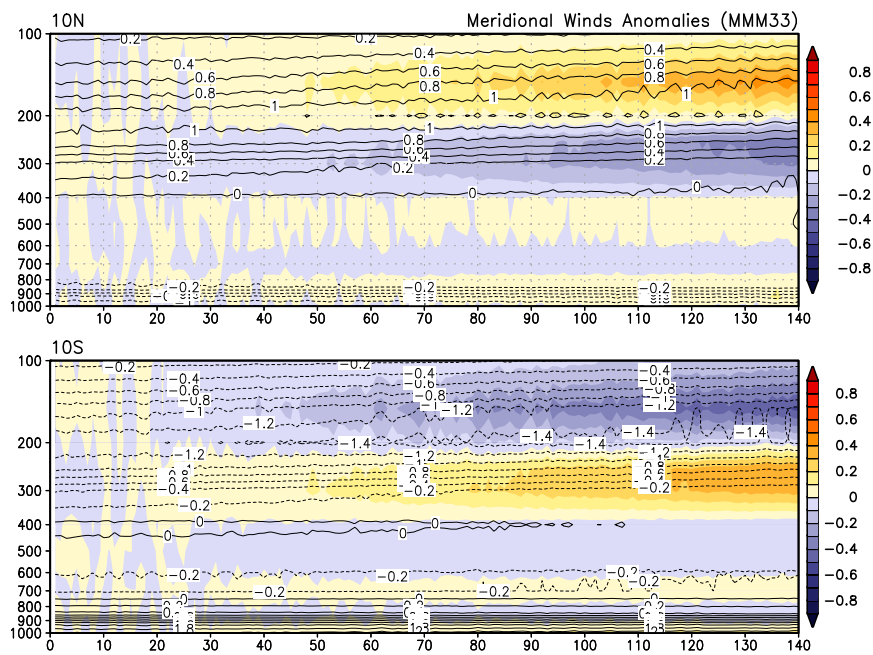

Fig. 54. Time–height cross section of meridional winds at 10°N (Upper) and 10°S (Lower). Unit is meters per second.
